# Supplementary material
Source: Springer Nature journal article supplement (https://www.springermedizin.de/resource/supplementary/12937_2009_282_MOESM1_ESM.pdf/25654778)

## Total mean DASS scores

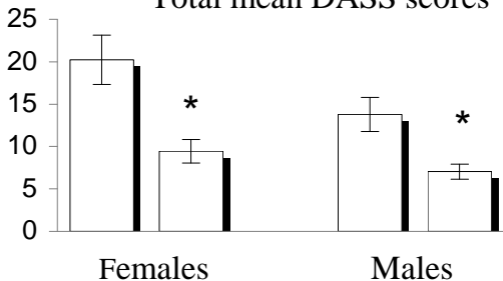

\*  $p < .01$

## Total mean POMS scores

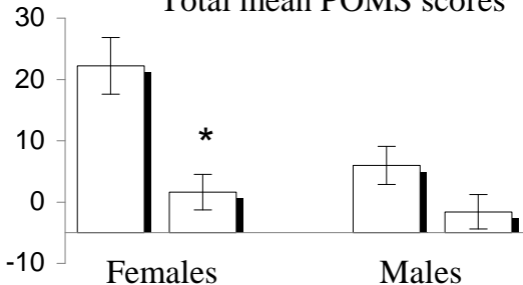

Supplement: MOESM1 [file 25654778]
